# Supplementary material
Source: PubMed Central journal article supplement (PMC7203178)
Supplement: 41398_2020_805_MOESM2_ESM.pdf [file 41398_2020_805_MOESM2_ESM.pdf]

## Supplementary Figure 2

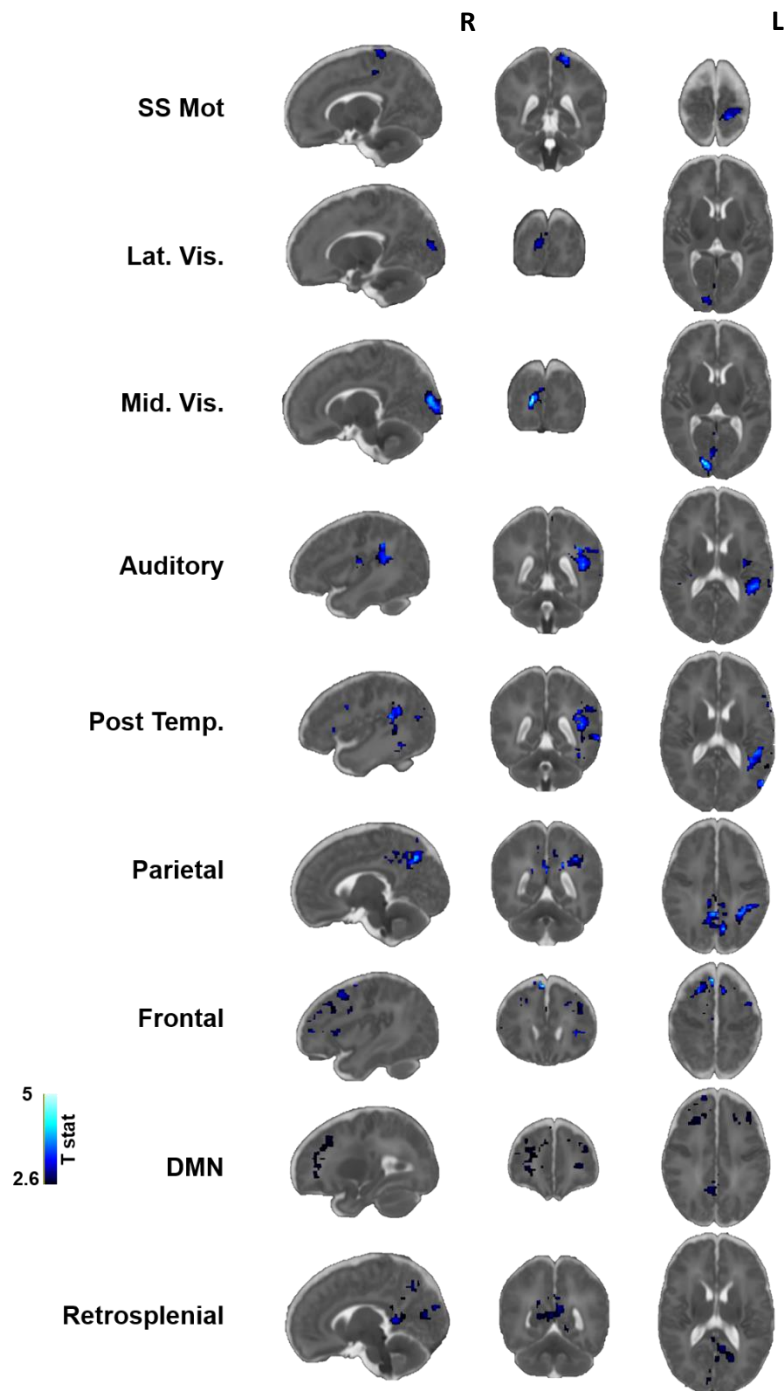

**Supplementary Figure 2. T statistic for Regional Homogeneity differences between groups.** Each row represents a resting state network where significant differences between groups were observed. The T statistic is thresholded to appear only if higher than 2.6 and overlaid on a neonatal T2 template.
